# Supplementary material for: Trimetallic clusters in the sumanene bowl for dinitrogen activation
Source: Royal Society of Chemistry journal article supplement (doi:10.1039/d2cp03346a), 2022-01-01
Supplement: d2cp03346a1.pdf [file d2cp03346a1.pdf]

**Supplementary Information for:**

**Trimetallic Clusters in the Sumanene Bowl for Dinitrogen Activation**

Ya-Ya Wang, Xun-Lei Ding\*, Yan Chen, Meng-Meng Wang, Wei Li, and Xin Wang

\* Author to whom correspondence should be addressed.

Email: dingxl@ncepu.edu.cn.

## Table of Contents

|                                                                                                                                                                                             |      |     |
|---------------------------------------------------------------------------------------------------------------------------------------------------------------------------------------------|------|-----|
| <b>Figure S1.</b> DFT calculated the lowest-lying isomers of $M_6$ ( $M = \text{Ti, Zr, V, and Nb}$ ).                                                                                      | .... | S3  |
| <b>Figure S2.</b> Low-lying stable structures of $C_{21}H_{12}-M_3$ with $M_3$ inside the bowl.                                                                                             | .... | S4  |
| <b>Figure S3.</b> Low-lying stable structures of $C_{21}H_{12}-M_3$ with $M_3$ outside the bowl.                                                                                            | .... | S5  |
| <b>Figure S4.</b> DFT calculated possible dissociation products when $M_3$ reacts with $N_2$ .                                                                                              | .... | S6  |
| <b>Figure S5.</b> DFT calculated potential-energy profiles of the reaction pathways of $N_2$ dissociation on $Ti_3$ and $C_{21}H_{12}-Ti_3$ .                                               | .... | S7  |
| <b>Figure S6.</b> DFT calculated potential-energy profiles of the reaction pathways of $N_2$ dissociation on $Zr_3$ and $C_{21}H_{12}-Zr_3$ .                                               | .... | S8  |
| <b>Figure S7.</b> DFT calculated potential-energy profiles of the reaction pathways of $N_2$ dissociation on $V_3$ and $C_{21}H_{12}-V_3$ .                                                 | .... | S9  |
| <b>Figure S8.</b> DFT calculated potential-energy profiles of the reaction pathways of $N_2$ dissociation on $Nb_3$ and $C_{21}H_{12}-Nb_3$ .                                               | .... | S10 |
| <b>Figure S9.</b> Density of state (DOS) of a) $N_2$ , b) $Ti_3$ , c) $C_{21}H_{12}$ , d) $C_{21}H_{12}-Ti_3$ , e) $Ti_3N_2$ , and f) $C_{21}H_{12}-Ti_3N_2$ , respectively.                | .... | S11 |
| <b>Figure S10.</b> Density of state (DOS) of a) $N_2$ , b) $Zr_3$ , c) $C_{21}H_{12}$ , d) $C_{21}H_{12}-Zr_3$ , e) $Zr_3N_2$ , and f) $C_{21}H_{12}-Zr_3N_2$ , respectively.               | .... | S12 |
| <b>Figure S11.</b> Density of state (DOS) of a) $N_2$ , b) $V_3$ , c) $C_{21}H_{12}$ , d) $C_{21}H_{12}-V_3$ , e) $V_3N_2$ , and f) $C_{21}H_{12}-V_3N_2$ , respectively.                   | .... | S13 |
| <b>Figure S12.</b> Calculated N–N bond lengths ( $R_{N-N}$ ) of $M_3$ and $C_{21}H_{12}-M_3$ .                                                                                              | .... | S14 |
| <b>Figure S13.</b> Calculated vibrational frequencies ( $\nu_{N-N}$ ) of $M_3$ and $C_{21}H_{12}-M_3$ .                                                                                     | .... | S15 |
| <b>Table S1.</b> The metal bond lengths ( $R_{M-M}$ ) of $M_3$ , $C_{21}H_{12}-M_3$ , and corresponding intermediates and transition states in the rate-determining step of $N_2$ transfer. | .... | S16 |
| <b>More detailed description of the reaction processes of <math>N_2</math> on <math>M_3</math> (<math>M = \text{Zr, V, and Nb}</math>).</b>                                                 | .... | S17 |

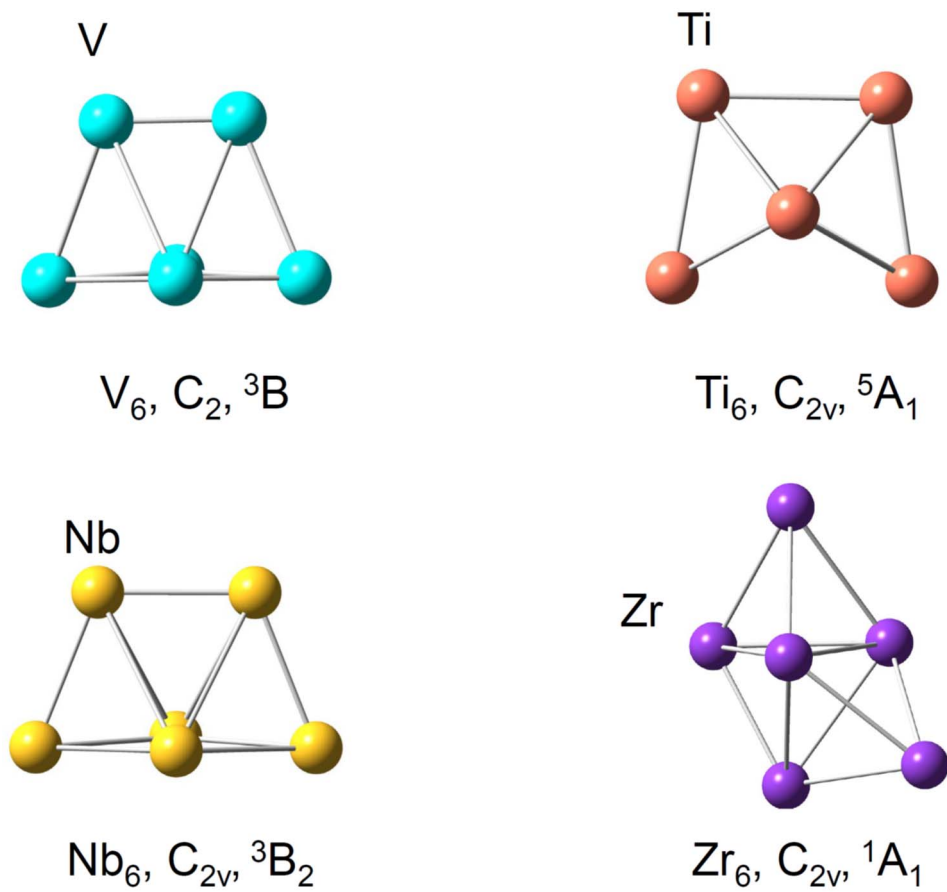

**Figure S1.** DFT calculated the lowest-lying isomers of  $M_6$  ( $M = Ti, Zr, V$ , and  $Nb$ ). The symmetry and electronic structure of each isomer are listed.

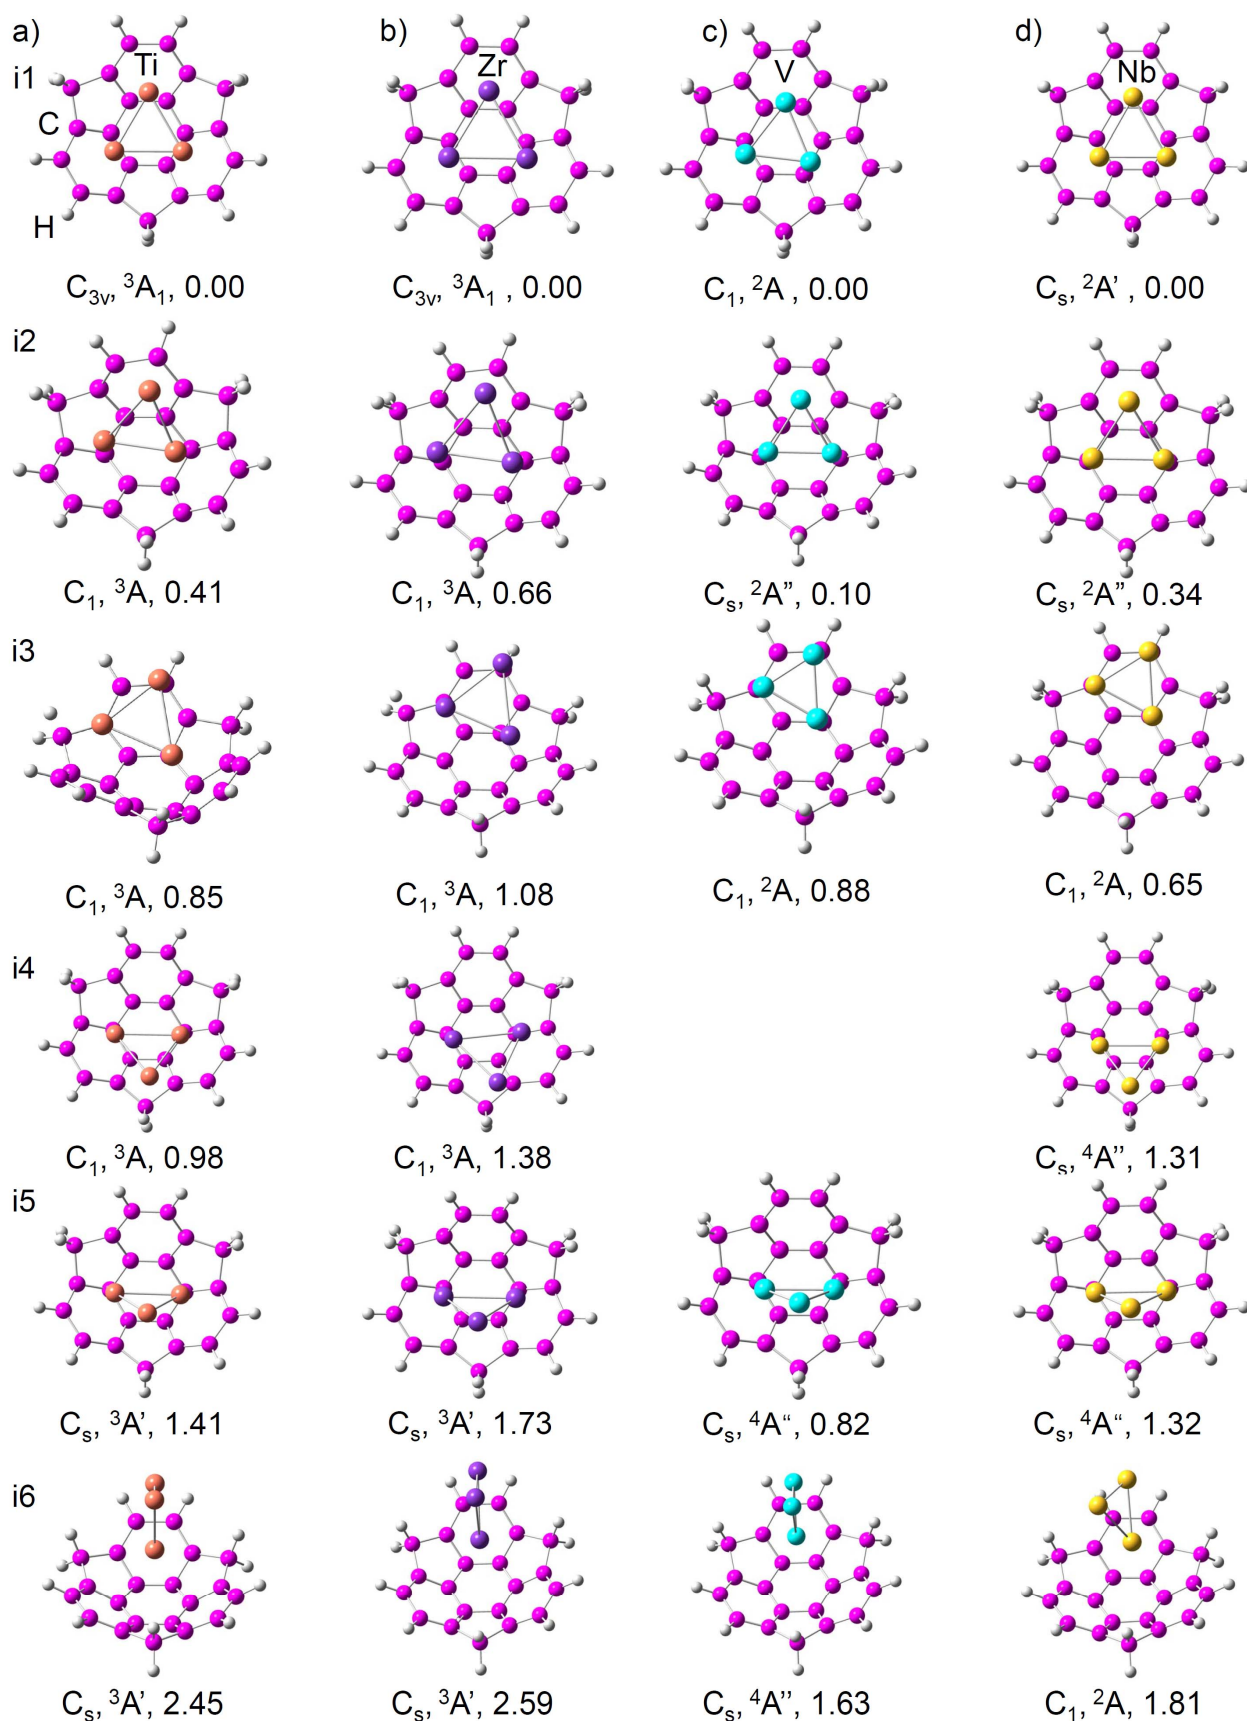

**Figure S2.** Low-lying stable structures of  $C_{21}H_{12}-M_3$  with  $M_3$  inside the bowl (denoted as i1-i6). Panels a), b), c), and d) are for  $M = Ti, Zr, V$ , and  $Nb$ , respectively. Relative energies with respect to the most stable structure are listed in eV.

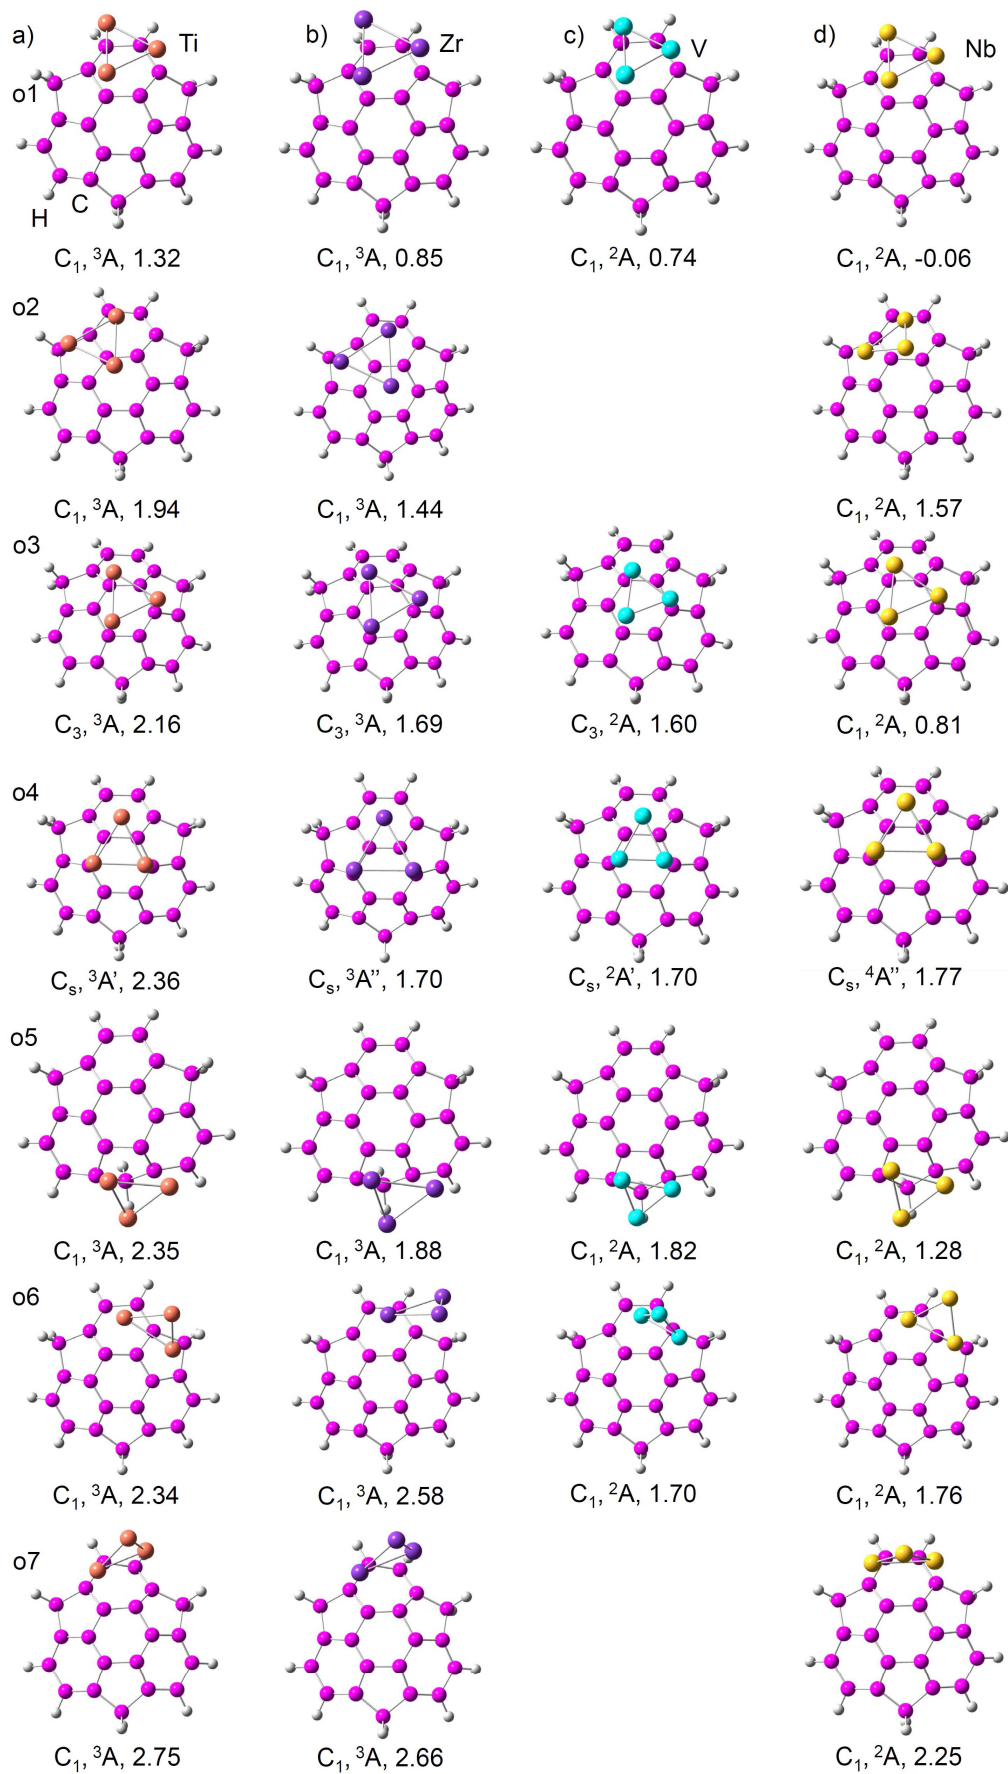

**Figure S3.** Low-lying stable structures of  $C_{21}H_{12}-M_3$  with  $M_3$  outside the bowl (denoted as o1-o7). Panels a), b), c), and d) are for  $M = Ti, Zr, V,$  and  $Nb$ , respectively. Relative energies with respect to the most stable structure are listed in eV.

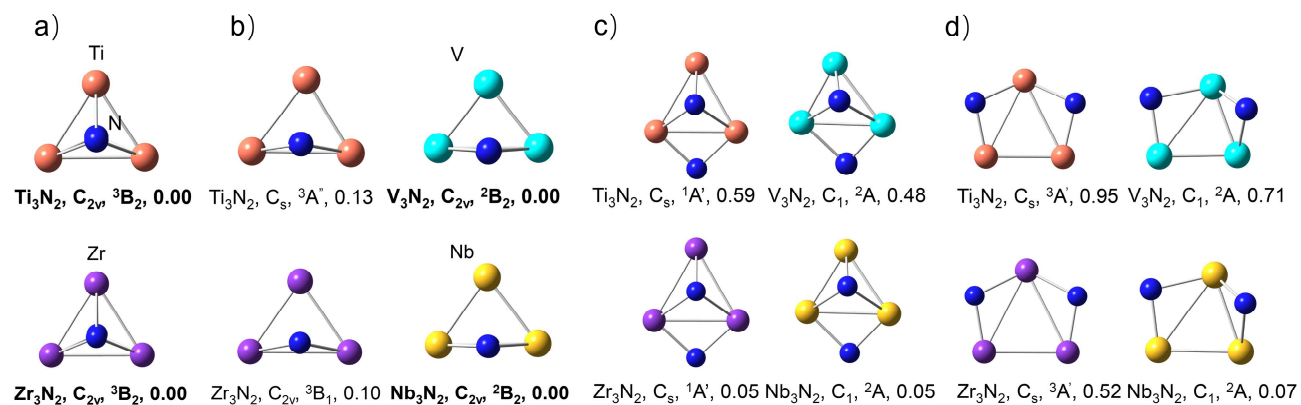

**Figure S4.** DFT calculated possible N–N dissociation products for reactions of M<sub>3</sub> (M = Ti, Zr, V, and Nb) and N<sub>2</sub>. The symmetry and electronic structure of each isomer are listed, and the relative energies of each structure are in eV.

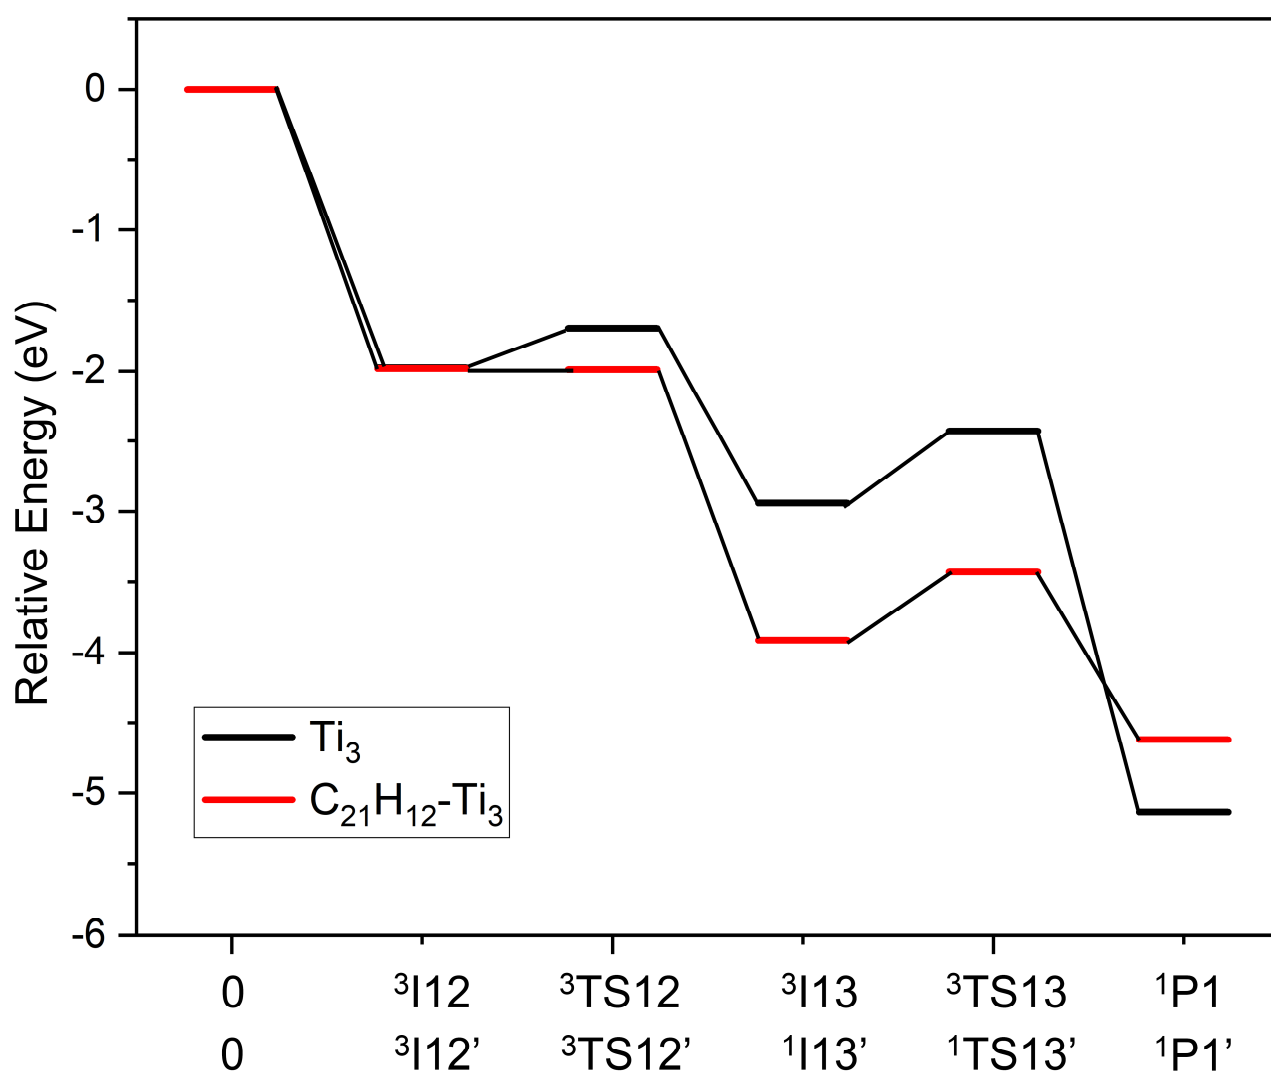

**Figure S5.** DFT calculated potential-energy profiles of the reaction pathways of  $N_2$  dissociation on  $Ti_3$  and  $C_{21}H_{12}-Ti_3$ . Relative energies with respect to the separated reactants are given in eV.

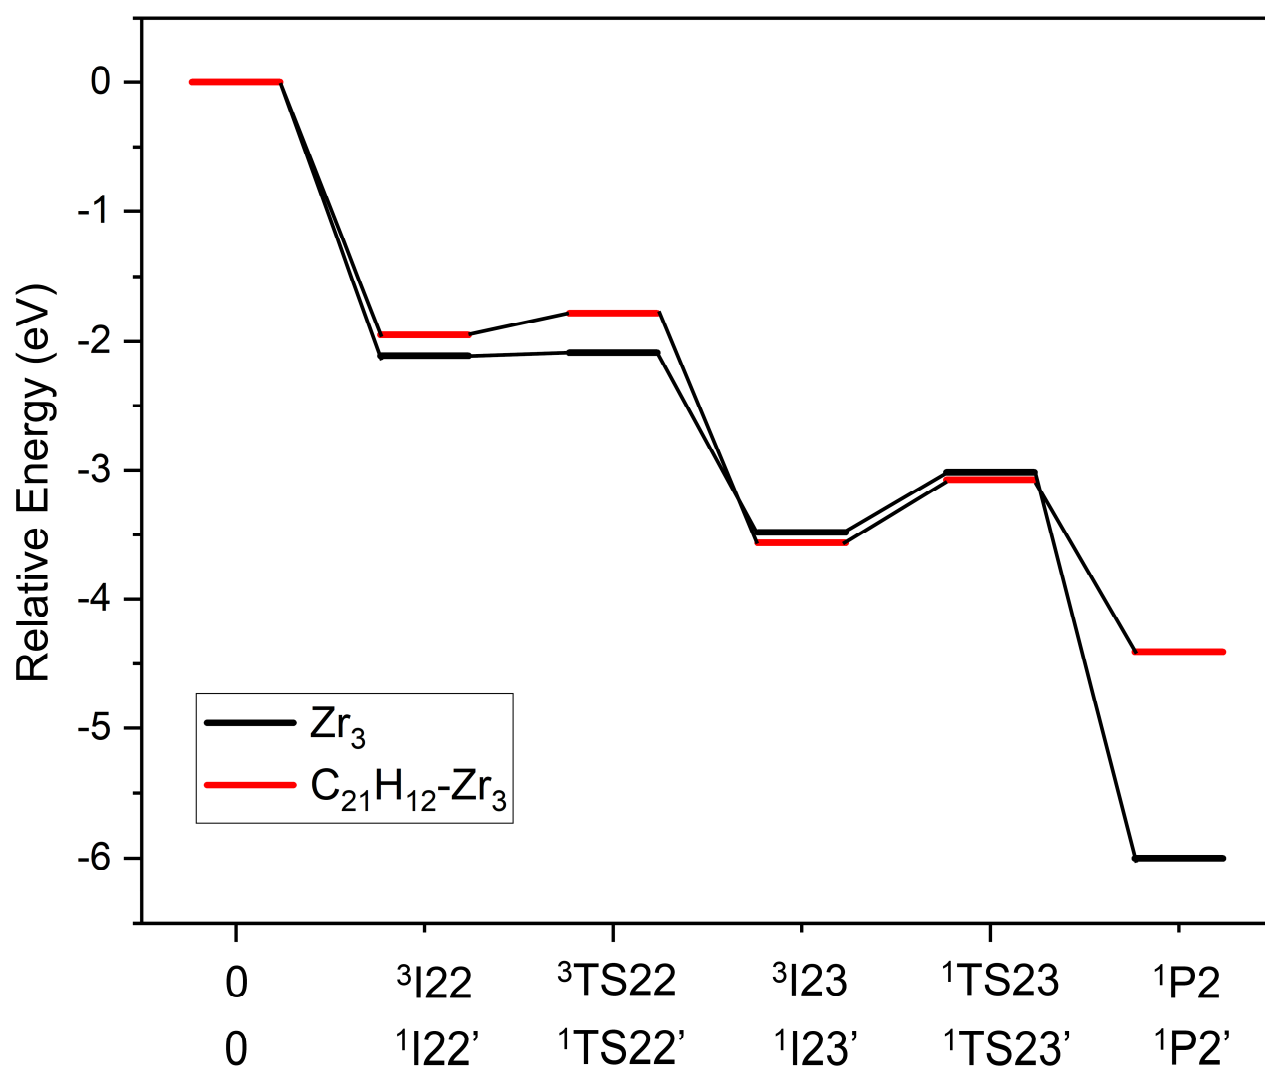

**Figure S6.** DFT calculated potential-energy profiles of the reaction pathways of  $N_2$  dissociation on  $Zr_3$  and  $C_{21}H_{12}-Zr_3$ . Relative energies with respect to the separated reactants are given in eV.



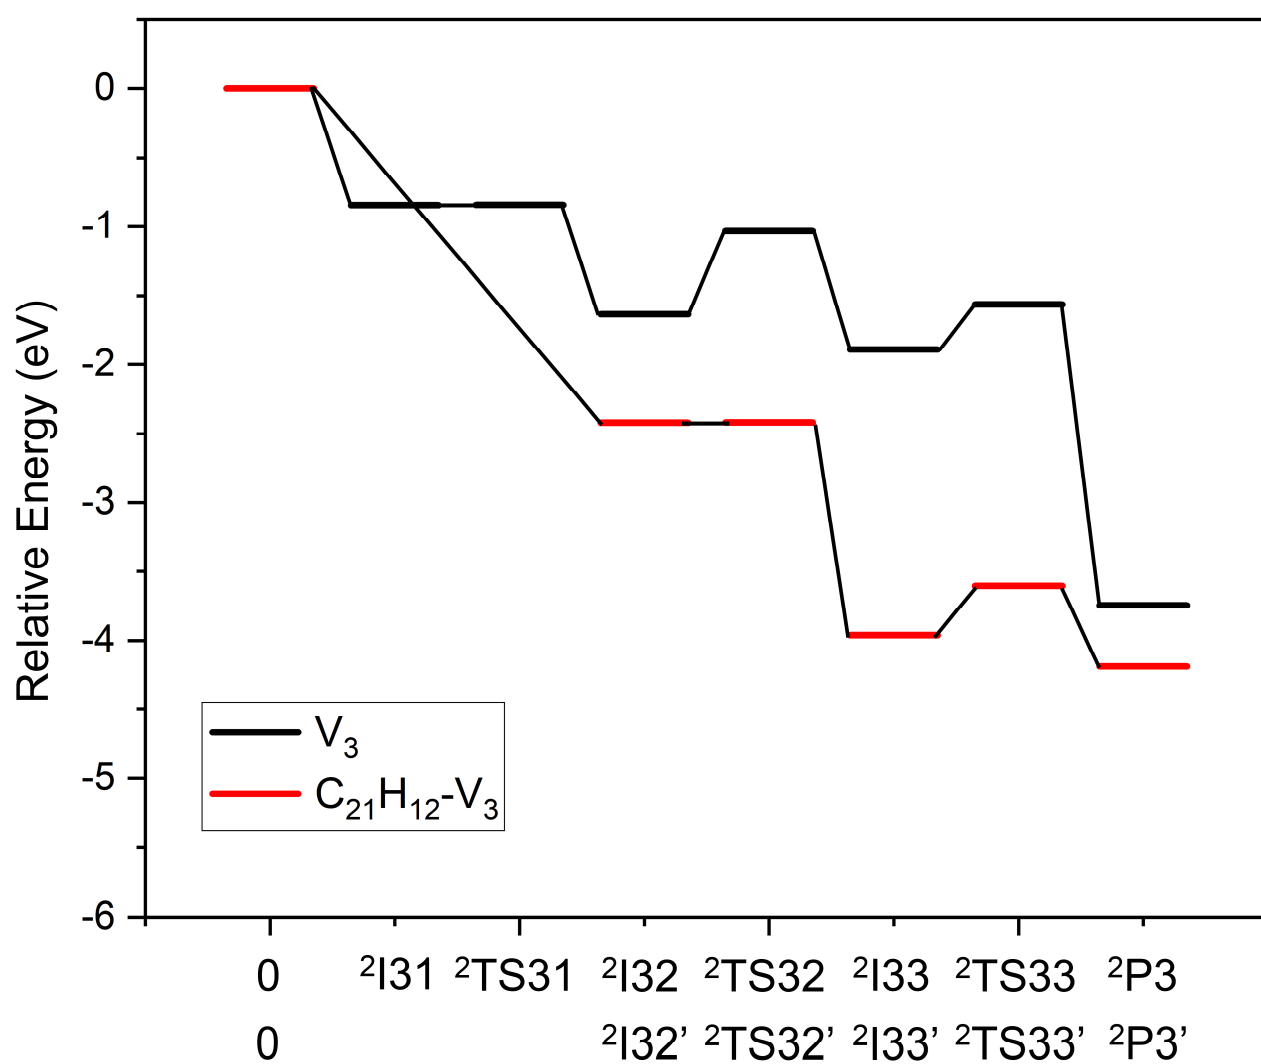

**Figure S7.** DFT calculated potential-energy profiles of the reaction pathways of  $N_2$  dissociation on  $V_3$  and  $C_{21}H_{12}-V_3$ . Relative energies with respect to the separated reactants are given in eV.

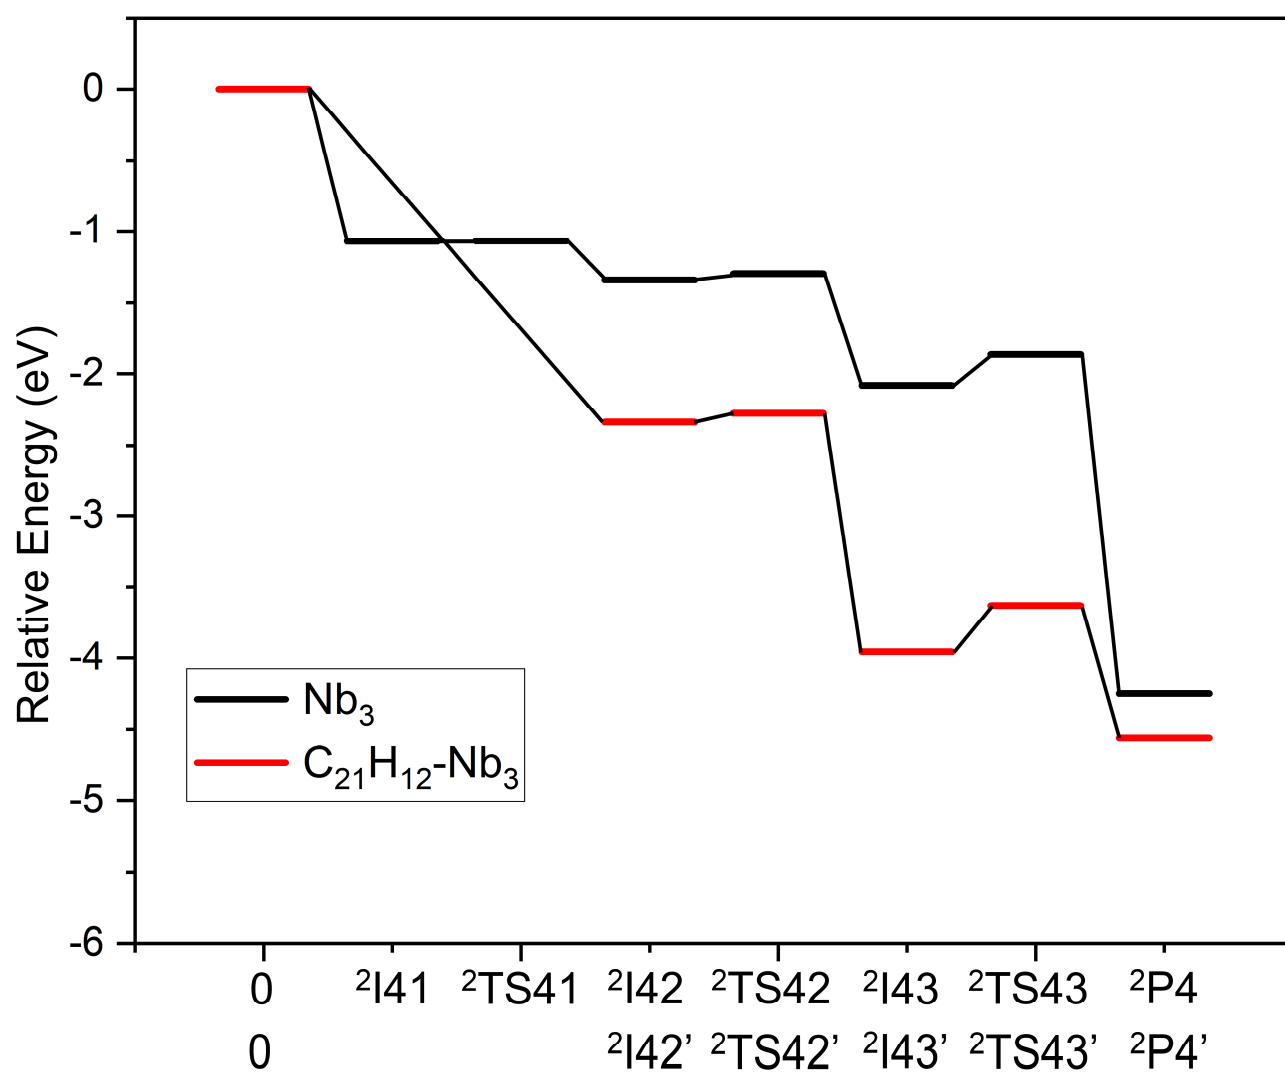

**Figure S8.** DFT calculated potential-energy profiles of the reaction pathways of N<sub>2</sub> dissociation on Nb<sub>3</sub> and C<sub>21</sub>H<sub>12</sub>-Nb<sub>3</sub>. Relative energies with respect to the separated reactants are given in eV.

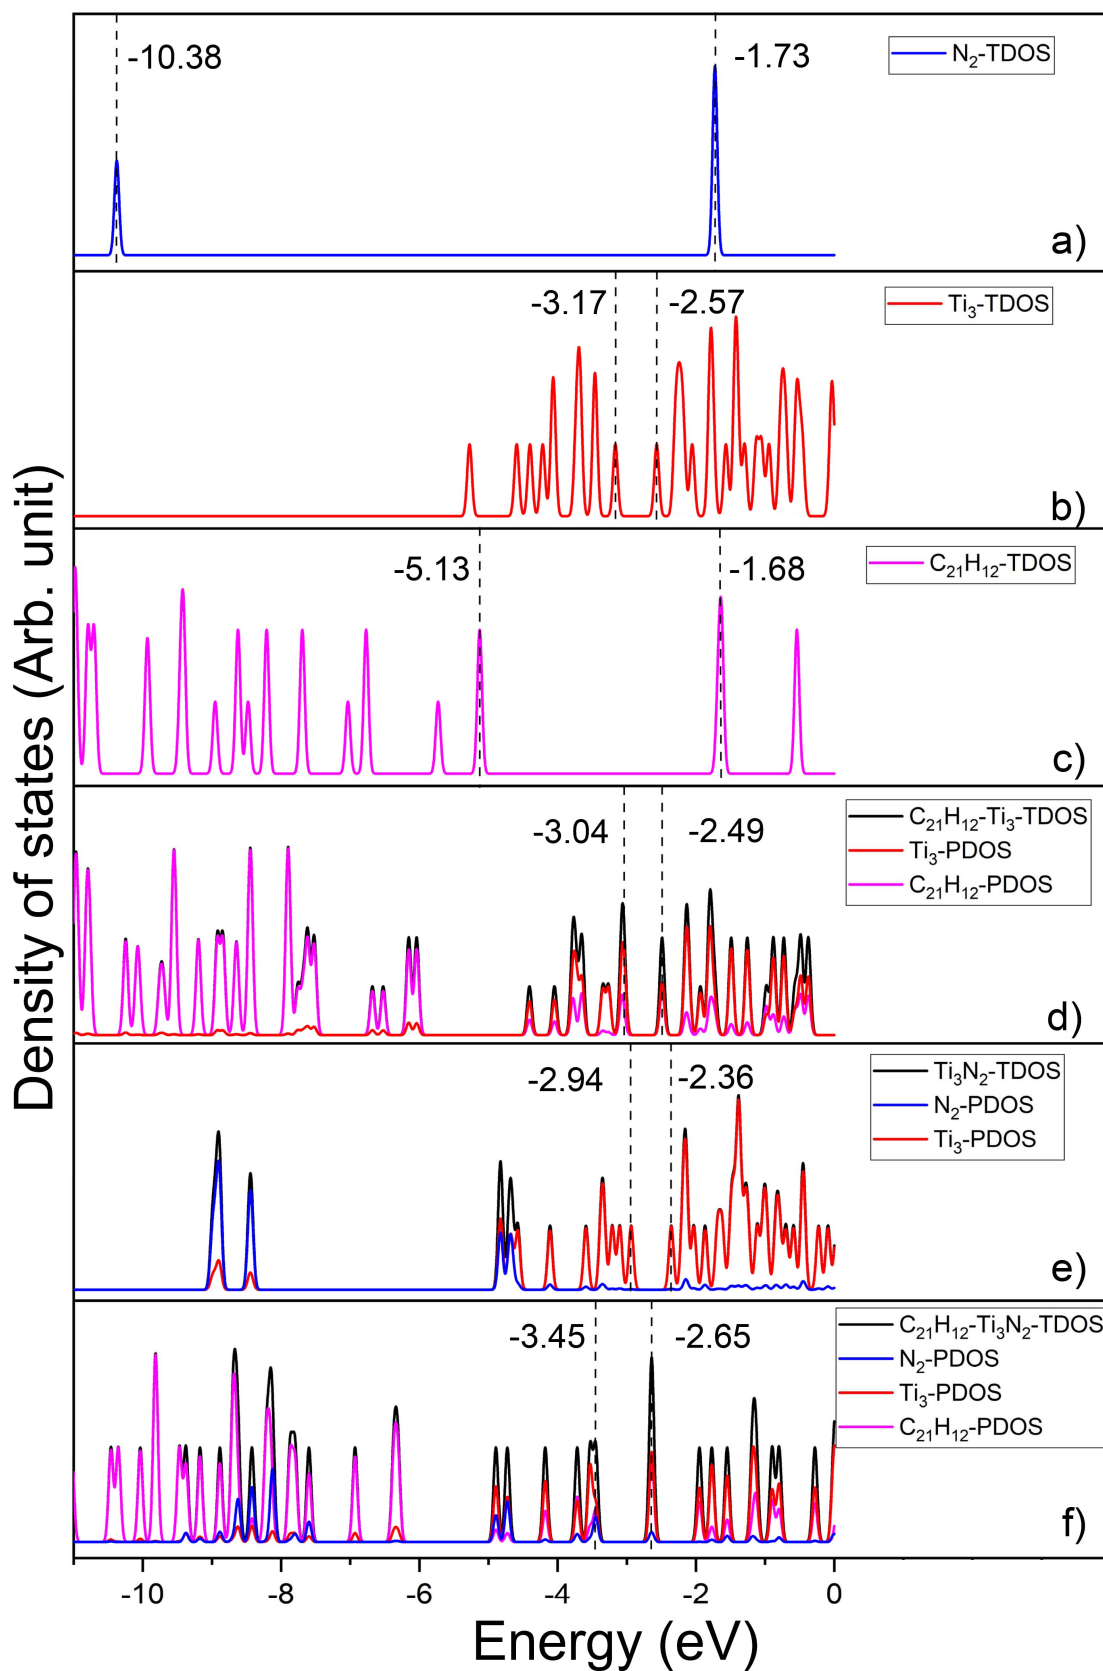

**Figure S9.** Density of state (DOS) of a) N<sub>2</sub>, b) Ti<sub>3</sub>, c) C<sub>21</sub>H<sub>12</sub>, d) C<sub>21</sub>H<sub>12</sub>-Ti<sub>3</sub>, e) Ti<sub>3</sub>N<sub>2</sub>, and f) C<sub>21</sub>H<sub>12</sub>-Ti<sub>3</sub>N<sub>2</sub>, respectively. The total DOS (TDOS) and partial DOS are shown. The vertical dashed lines indicate the positions of the HOMO (left) or LUMO (right) in each panel, together with the values labelled in eV.

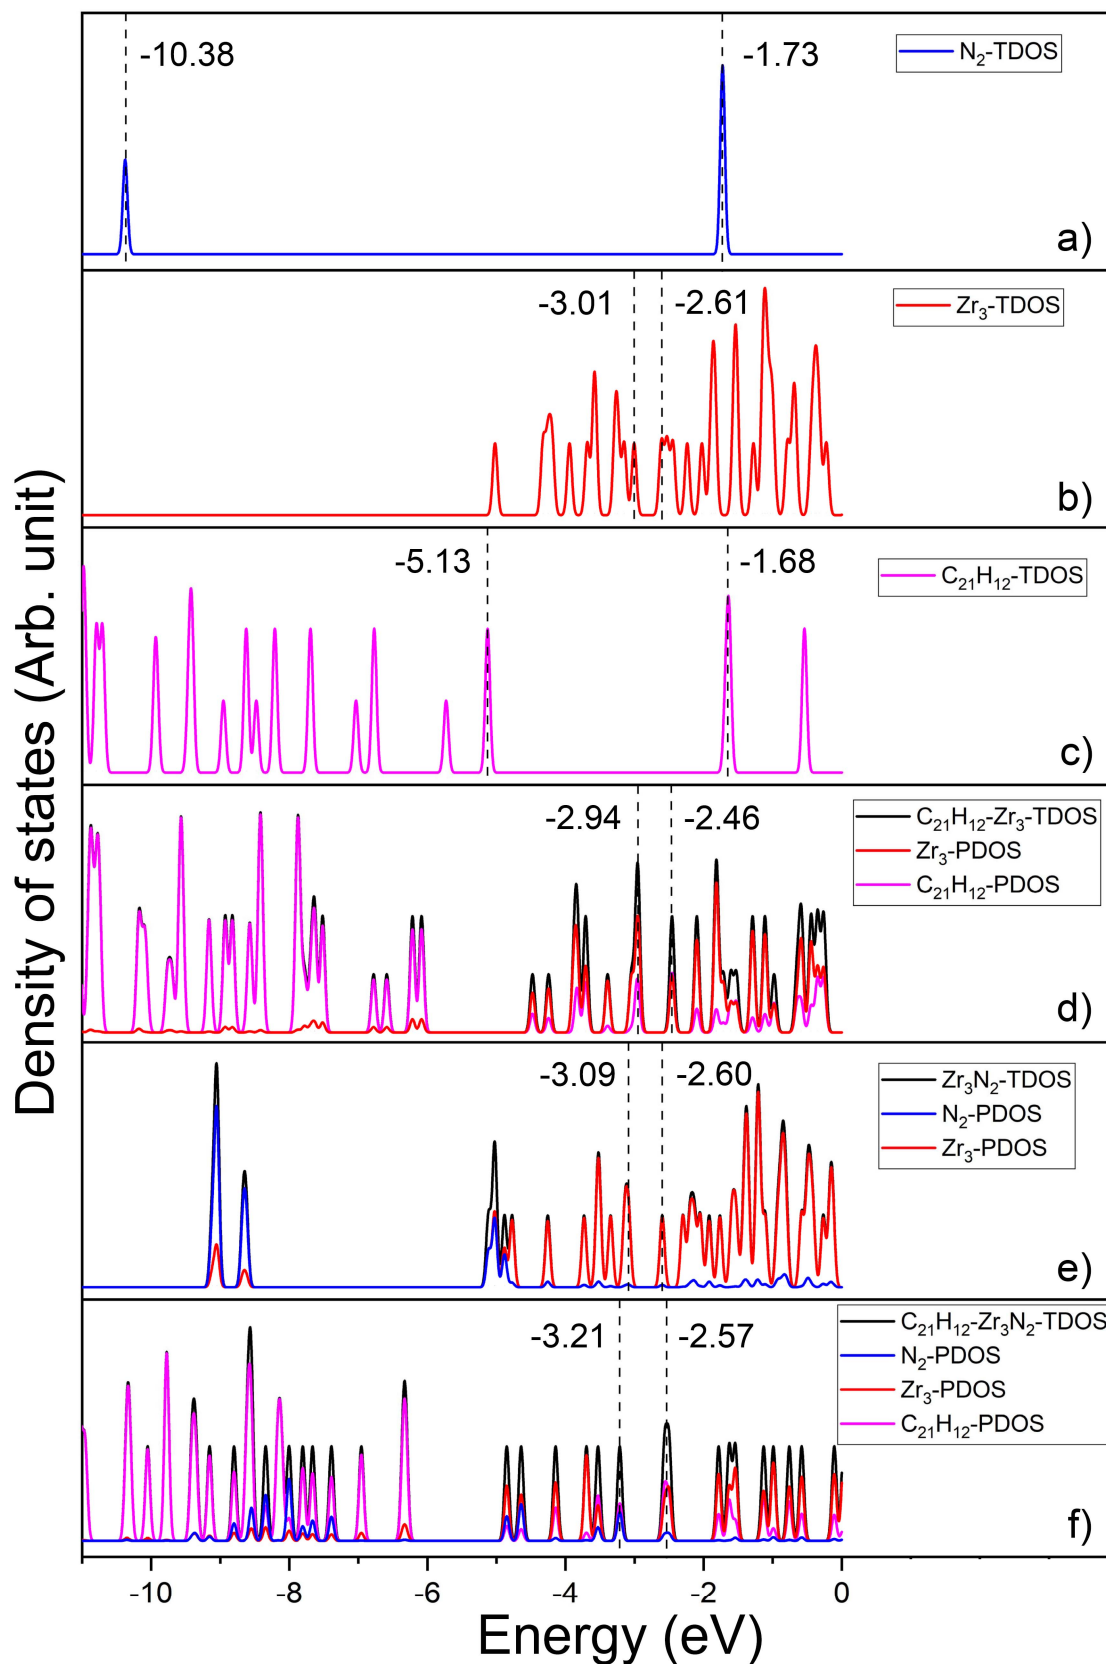

**Figure S10.** Density of state (DOS) of a)  $N_2$ , b)  $Zr_3$ , c)  $C_{21}H_{12}$ , d)  $C_{21}H_{12}$ - $Zr_3$ , e)  $Zr_3N_2$ , and f)  $C_{21}H_{12}$ - $Zr_3N_2$ , respectively. The total DOS and partial DOS are shown. The vertical dashed lines indicate the positions of the HOMO (left) or LUMO (right) in each panel, together with the values labelled in eV.

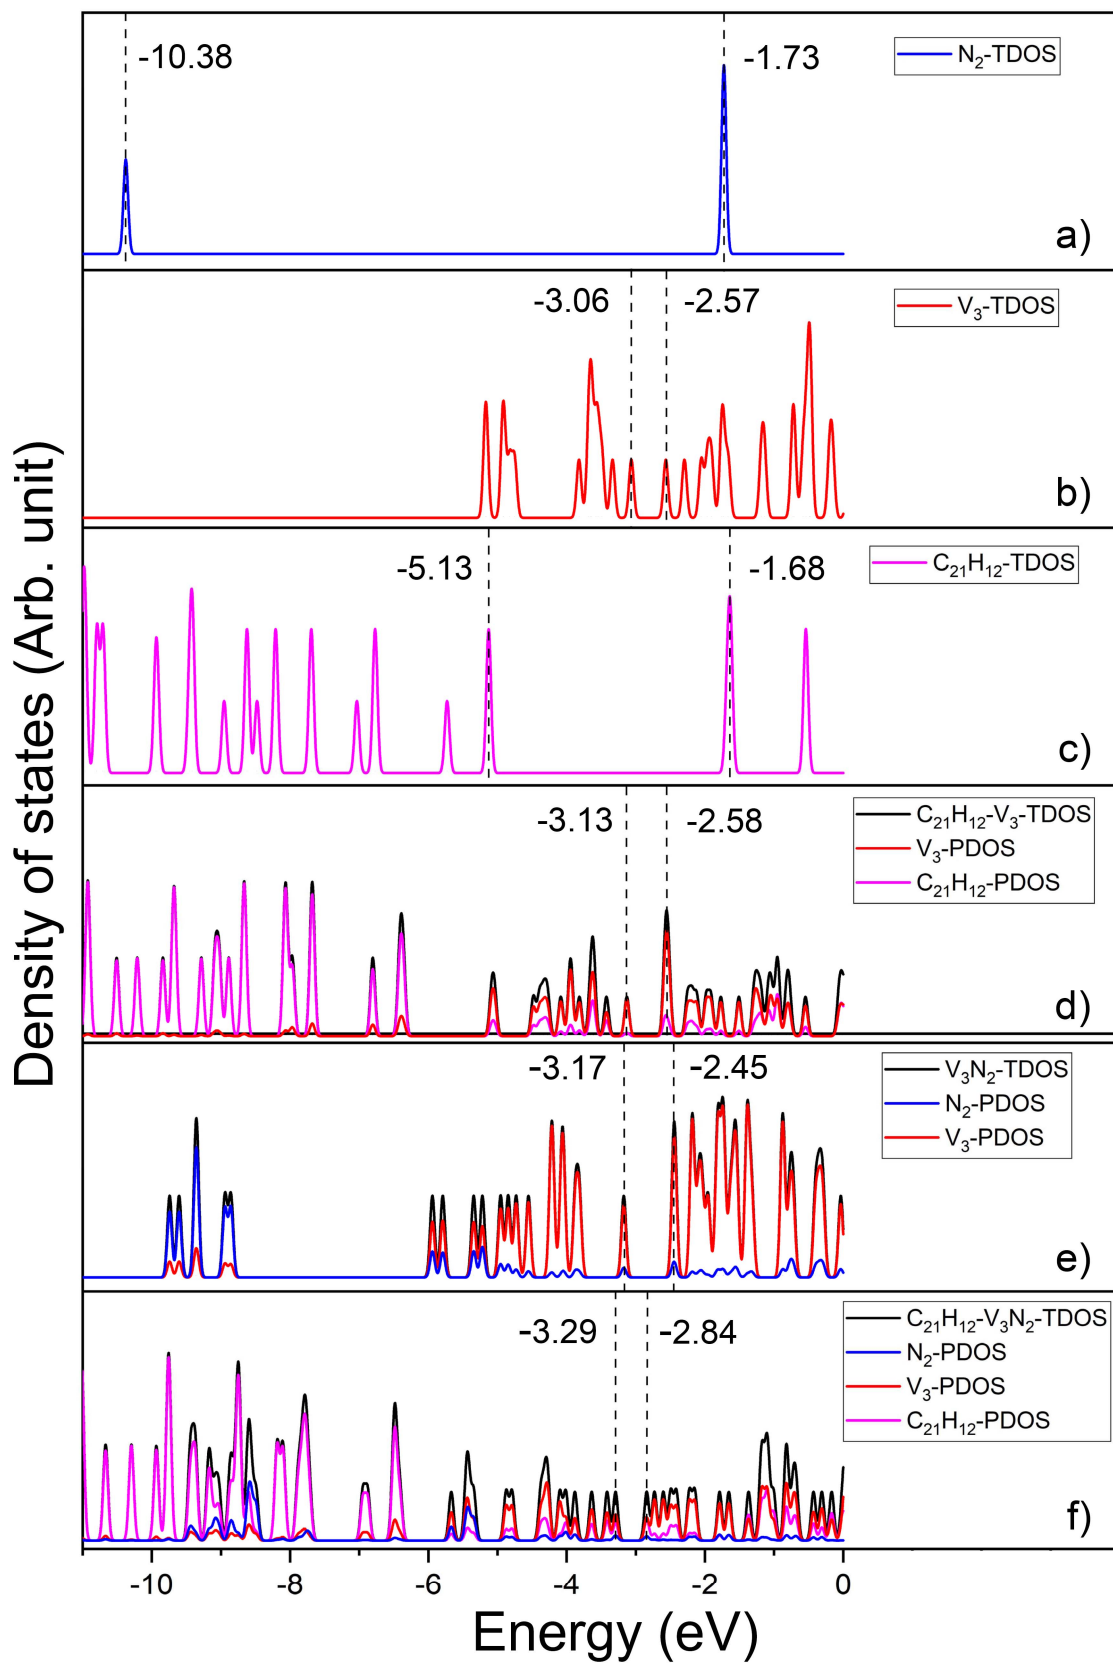

**Figure S11.** Density of state (DOS) of a)  $N_2$ , b)  $V_3$ , c)  $C_{21}H_{12}$ , d)  $C_{21}H_{12}-V_3$ , e)  $V_3N_2$ , and f)  $C_{21}H_{12}-V_3N_2$ , respectively. The total DOS and partial DOS are shown. The vertical dashed lines indicate the positions of the HOMO (left) or LUMO (right) in each panel, together with the values labelled in eV.

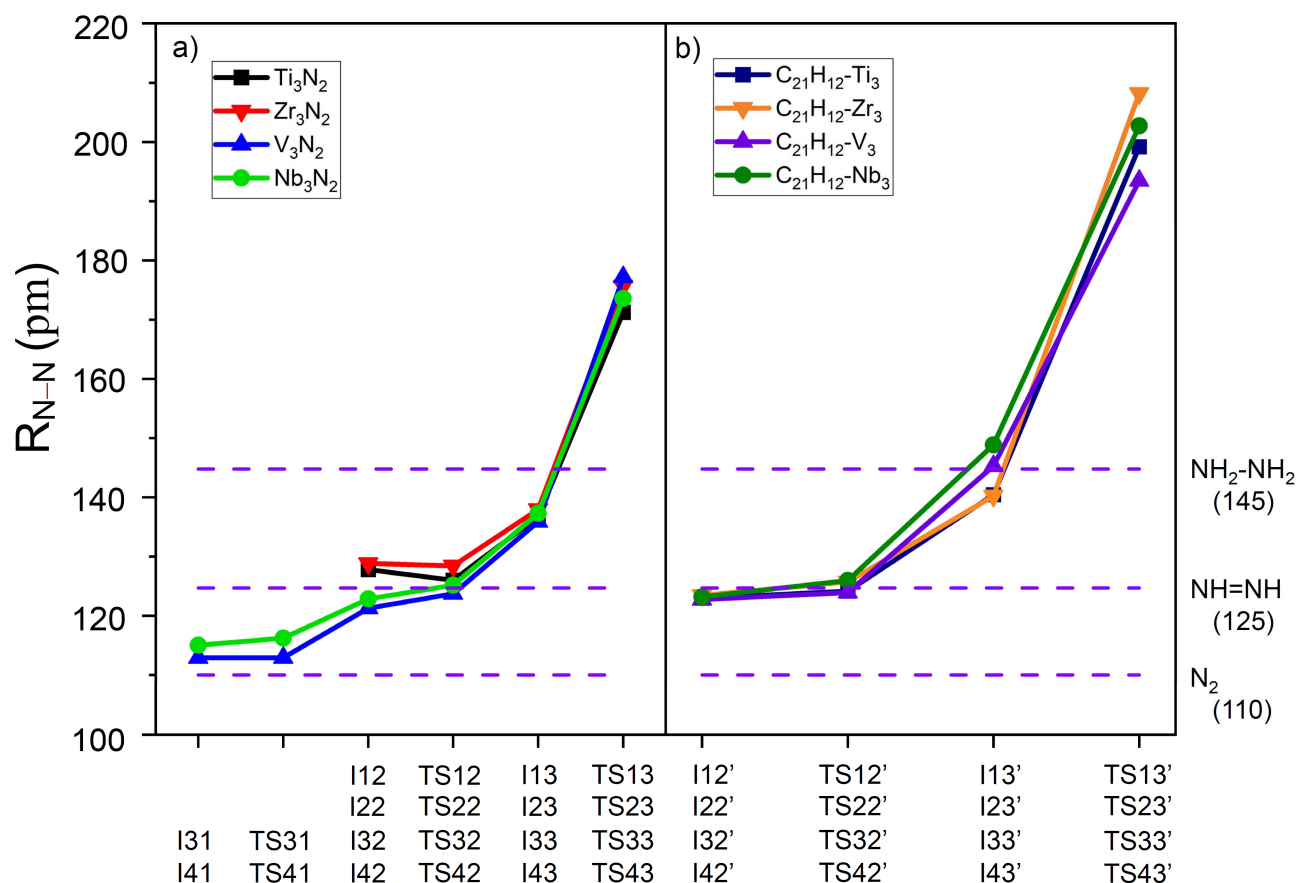

**Figure S12.** Calculated N–N bond lengths ( $R_{N-N}$ ) of  $N_2$  moiety in reaction intermediates and transition states for a)  $M_3$  and b)  $C_{21}H_{12}-M_3$  ( $M=Ti, Zr, V$ , and  $Nb$ ). As references, three horizontal lines indicate the  $R_{N-N}$  of the triple, double, and single N–N bonds in free  $N_2$ ,  $N_2H_2$ , and  $N_2H_4$ , respectively, with their calculated  $R_{N-N}$  values in brackets.

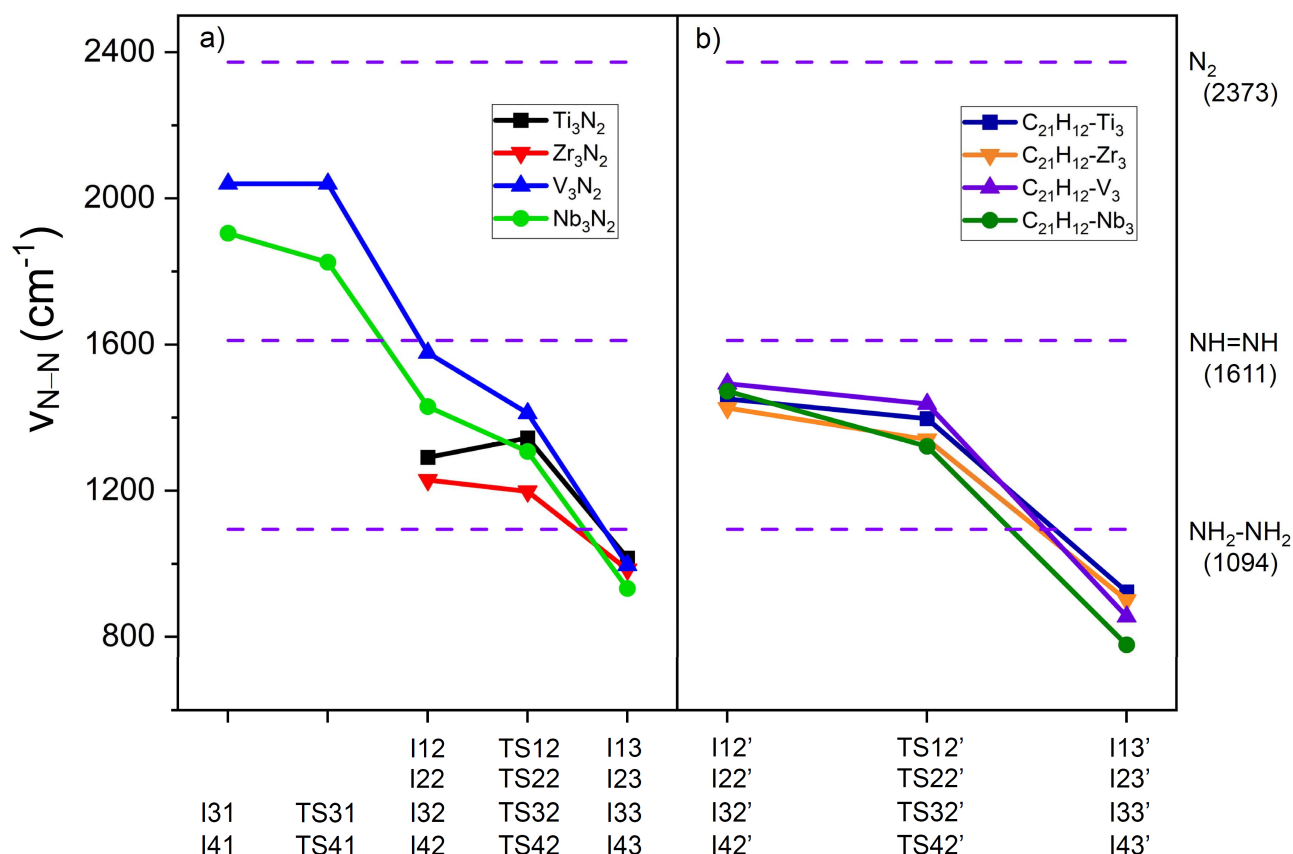

**Figure S13.** Calculated vibrational frequencies ( $\nu_{\text{N-N}}$ ) of  $\text{N}_2$  moiety in reaction intermediates and transition states for a)  $\text{M}_3$  and b)  $\text{C}_{21}\text{H}_{12}-\text{M}_3$  ( $\text{M} = \text{Ti}, \text{Zr}, \text{V}, \text{and Nb}$ ). As references, three horizontal lines indicate the  $\nu_{\text{N-N}}$  of the triple, double, and single N–N bonds in free  $\text{N}_2$ ,  $\text{N}_2\text{H}_2$ , and  $\text{N}_2\text{H}_4$ , respectively, with their calculated  $\nu_{\text{N-N}}$  values in brackets.

**Table S1.** The metal bond lengths ( $R_{M-M}$ ) of  $M_3$ ,  $C_{21}H_{12}-M_3$ , and corresponding intermediates and transition states in the rate-determining step of  $N_2$  transfer.  $\Delta R_{M-M}$  is the difference of  $R_{M-M}$  between the intermediate and the transition state. All bond lengths are in pm.

| Clusters         |     |     |     | Clusters                                         |     |     |     |
|------------------|-----|-----|-----|--------------------------------------------------|-----|-----|-----|
| $R_{M-M}$        |     |     |     | $R_{M-M}$                                        |     |     |     |
| Ti <sub>3</sub>  | 245 | 207 | 245 | C <sub>21</sub> H <sub>12</sub> -Ti <sub>3</sub> | 260 | 260 | 260 |
| I12              | 252 | 206 | 260 | I12'                                             | 268 | 267 | 270 |
| TS12             | 254 | 231 | 259 | TS12'                                            | 259 | 257 | 267 |
| $\Delta R_{M-M}$ | 2   | 25  | -1  | $\Delta R_{M-M}$                                 | -9  | -10 | -3  |
|                  |     |     |     |                                                  |     |     |     |
| Zr <sub>3</sub>  | 261 | 261 | 268 | C <sub>21</sub> H <sub>12</sub> -Zr <sub>3</sub> | 287 | 287 | 287 |
| I22              | 277 | 250 | 288 | I22'                                             | 292 | 296 | 297 |
| TS22             | 279 | 256 | 281 | TS22'                                            | 279 | 293 | 301 |
| $\Delta R_{M-M}$ | 2   | 6   | -7  | $\Delta R_{M-M}$                                 | -13 | -3  | 4   |
|                  |     |     |     |                                                  |     |     |     |
| V <sub>3</sub>   | 225 | 175 | 225 | C <sub>21</sub> H <sub>12</sub> -V <sub>3</sub>  | 237 | 240 | 241 |
| I32              | 240 | 181 | 225 | I32'                                             | 239 | 265 | 263 |
| TS32             | 234 | 198 | 228 | TS32'                                            | 238 | 264 | 257 |
| $\Delta R_{M-M}$ | -6  | 17  | 3   | $\Delta R_{M-M}$                                 | -1  | -1  | -6  |
|                  |     |     |     |                                                  |     |     |     |
| Nb <sub>3</sub>  | 241 | 226 | 241 | C <sub>21</sub> H <sub>12</sub> -Nb <sub>3</sub> | 266 | 272 | 272 |
| I42              | 246 | 240 | 245 | I42'                                             | 264 | 278 | 292 |
| TS42             | 246 | 239 | 243 | TS42'                                            | 267 | 273 | 289 |
| $\Delta R_{M-M}$ | 0   | -1  | -2  | $\Delta R_{M-M}$                                 | 3   | -5  | -3  |



## More detailed description of the reaction processes of N<sub>2</sub> on M<sub>3</sub> (M = Zr, V, and Nb)

The reaction process of Zr<sub>3</sub> and N<sub>2</sub> is similar to that of Ti<sub>3</sub> + N<sub>2</sub> (Figure 4b). Two spin flips (CP3 and CP4) are needed to reduce the spin multiplicity from <sup>5</sup>Zr<sub>3</sub> to the first adsorption complex (<sup>3</sup>I22), and then to the dissociation transition state <sup>1</sup>TS23. Compared with Ti<sub>3</sub>, the transfer of N<sub>2</sub> on Zr<sub>3</sub> is even easier with an energy barrier of only 0.02 eV (<sup>3</sup>I22→<sup>3</sup>TS22), while the N–N dissociation step, the rate-determining step, still requires a high barrier of 0.46 eV (c.f. 0.51 eV of Ti<sub>3</sub>). The reaction Zr<sub>3</sub> + N<sub>2</sub> (–6.00 eV) is also more exothermic than Ti<sub>3</sub> + N<sub>2</sub> (–5.13 eV). So Zr<sub>3</sub> may be a little more reactive than Ti<sub>3</sub> towards N<sub>2</sub>.

The reaction processes of V<sub>3</sub>/Nb<sub>3</sub> + N<sub>2</sub> are shown in Figures 4 c and d, respectively. Some different situations are found for these two systems compared with previous ones. Firstly, the whole reaction processes are always in a low spin state (doublet), so spin flips are no longer needed. Secondly, additional stable adsorption complexes with N<sub>2</sub> terminal end-on coordination on one metal atom can be obtained for V<sub>3</sub> (I31) and Nb<sub>3</sub> (I41). The N<sub>2</sub> molecule in this structure can transfer to the bridging ES on two metal atoms, as in Ti<sub>3</sub>/Zr<sub>3</sub> + N<sub>2</sub>, with negligible energy barriers (< 0.01 eV). Thirdly, for V<sub>3</sub> + N<sub>2</sub>, the overall rate-determining step is the transfer of N<sub>2</sub> from I32 to TS32 (0.60 eV), which is higher than the N–N dissociation barrier of 0.33 eV (I33→TS33). Although the N–N dissociation on V<sub>3</sub> is more accessible than on Ti<sub>3</sub> and Zr<sub>3</sub>, the transfer barrier on V<sub>3</sub> is 0.1 eV higher than the N–N dissociation barriers on Ti<sub>3</sub> and Zr<sub>3</sub>. So V<sub>3</sub> is less reactive than Ti<sub>3</sub> and Zr<sub>3</sub>. On the other hand, the N–N dissociation barrier on Nb<sub>3</sub> (I43→TS43, 0.21 eV) is even lower than that on V<sub>3</sub>, and the energy barrier of N<sub>2</sub> transfer on Nb<sub>3</sub> (I42→TS42) is also small (0.04 eV). Therefore, Nb<sub>3</sub> is suggested to have the highest reactivity towards N<sub>2</sub>, with low energy barriers for both N<sub>2</sub> transfer and N–N dissociation. The last different situation is for the reaction of Nb<sub>3</sub> + N<sub>2</sub>, whose dissociation product has a different structure in which two N atoms occupy two bridge sites, respectively.
